# Supplementary material for: An in situ study of the hydriding kinetics of Pd thin films
Source: Royal Society of Chemistry journal article supplement (doi:10.1039/c0cp02773a), 2011-01-01

## Supporting information Manuscript CP-ART-12-2010-002773.R1

With respect to the absolute stress at the end of regime 1 (so at  $t = t_{tr}$ ), the figure below confirms that these values are independent of  $p_{H_2}$ . Our results therefore indicate that the H-concentration at the end of regime 1 is independent of  $p_{H_2}$ , but that the time  $t_{tr}$  at which the transition to the second regime occurs is influenced by the hydrogen pressure (see Fig. 7 in this respect). The graph below also shows the equilibrium absolute stress value corresponding to the plateau at the end of the 3<sup>th</sup> regime, to show that the latter does show a clear trend, proportional to Sievert's constant (as already indicated in Fig. 4).

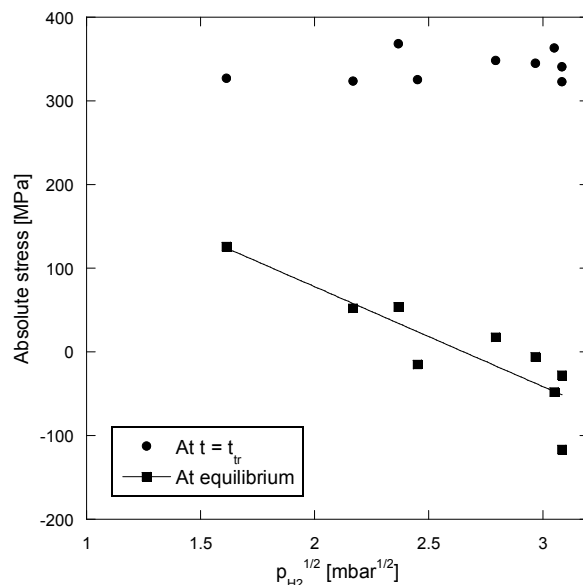

The figure belows explicitly shows the  $p_{H_2}$ -dependence of  $I_{\sigma}$ . No clear trend can be observed in the  $p_{H_2}$ -range considered in our study. That is the reason why we decided to rather mention its average value of  $446 \pm 27$  MPa. The reason for  $I_{\sigma}$  apparently being independent of  $p_{H_2}$  is that, while the slope in the second kinetic regime increases with  $p_{H_2}$ , the time  $t_{tr}$  at which the transition between the two regimes occurs decreases with  $p_{H_2}$ . Therefore, using an average value of  $I_{\sigma}$  is probably an approximation, but we believe that this is justified in the  $p_{H_2}$ -range considered in our study.

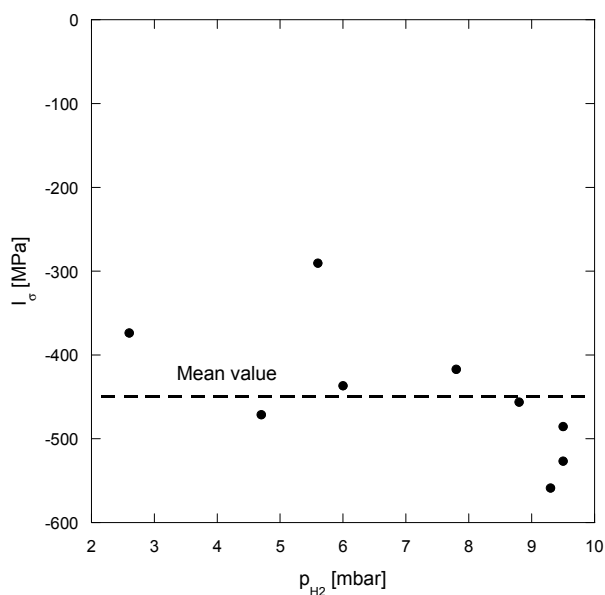

Supplement: c0cp02773a.pdf [file c0cp02773a.pdf]
